# Supplementary material for: Hg2+ detection, pH sensing and cell imaging based on bright blue-fluorescent N-doped carbon dots
Source: Royal Society of Chemistry journal article supplement (doi:10.1039/d0an01487g), 2020-01-01
Supplement: d0an01487g1.pdf [file d0an01487g1.pdf]

## Supplementary Materials for:

### Hg<sup>2+</sup> detection, pH sensing and cell imaging based on bright blue-fluorescent N-doped carbon dots

Dan Chang<sup>a</sup>, Lin Li<sup>a</sup>, Lihong Shi<sup>a,\*</sup>, Yongxing Yang<sup>a,\*</sup>

#### Materials

Folic acid and citric acid were obtained through Shanghai Aladdin Reagent Co., Ltd. (Shanghai, China). AlCl<sub>3</sub>, BaCl<sub>2</sub>, CaCl<sub>2</sub>, CdCl<sub>2</sub>, CoCl<sub>2</sub>, CuCl<sub>2</sub>, FeCl<sub>3</sub>, HgCl<sub>2</sub>, MgCl<sub>2</sub>, MnCl<sub>2</sub>, NaCl, NiCl<sub>2</sub>, PbCl<sub>2</sub> and ZnCl<sub>2</sub> were obtained through Beijing Chemical Corp (Beijing, China). Dialysis membranes with a MWCO of 500–1000 Da were obtained through Beijing Solarbio Science & Technology Co., Ltd. (Beijing, China). HepG-2 cells were obtained from the Cell Bank of the Chinese Academy of Sciences (Shanghai, China).

#### Apparatus

Transmission electron microscopy (TEM) studies were carried out in a JEOL JEM-2100 instrument operating at an accelerating voltage of 200 kV. Samples for TEM measurements were obtained via placing a drop of colloidal solution on a carbon coated copper grid and then drying at room temperature. The UV-vis absorption spectrum was recorded through HITACHI U-2910 UV. The fluorescence spectrum was operated with a Hitachi F-4500 fluorescence spectrophotometer (Tokyo, Japan). Fourier transform infrared (FTIR) spectra were recorded on a Bruker tensor 2 spectrometer at a resolution of 4 cm<sup>-1</sup>. A 1 mg sample (ratio 1:200) diluted in KBr was pressed into the pan.

---

<sup>a</sup> College of Chemistry and Chemical Engineering, Shanxi University, Taiyuan, 030006, PR China

\* Corresponding author. E-mail address: [shilihong@sxu.edu.cn](mailto:shilihong@sxu.edu.cn), [yangyongxing@sxu.edu.cn](mailto:yangyongxing@sxu.edu.cn).

### Cell imaging

In a 5% CO<sub>2</sub> incubator, HepG-2 cells in the exponential phase were seeded into 15 mm glass culture dishes at an initial density of  $1 \times 10^6$  cells/mL with DMEM containing 10% FBS and incubated at 37°C. After incubation, the medium was discarded and HepG-2 cells were treated with mixture of N-CDs (200 µg/mL) and DMEM for 40 min. The extracellular N-CDs were removed by rinsing twice with phosphate buffer solutions (pH =7), and then cells were incubated with PBS buffer (0.01 M) containing a range of concentration of Hg<sup>2+</sup>. Immediately, fluorescence images were captured on laser scanning confocal microscope (LSCM). For intracellular pH sensing, under the above conditions, HepG-2 cells was cultured by taking the place of pH 8.

### QY measurements

Quinine sulfate in 0.1 M H<sub>2</sub>SO<sub>4</sub> was selected as a reference with a QY of 0.54 at 360 nm. The relative fluorescence QY ( $\Phi$ ) of as-prepared N-CDs was calculated using the equation:  $\Phi_x = \Phi_{\text{std}} I_x A_{\text{std}} \eta_x^2 / (I_{\text{std}} A_x \eta_{\text{std}}^2)$ . In the equation,  $I_x$  and  $I_{\text{std}}$  denote the fluorescence intensities of obtained N-CDs and reference, respectively.  $A_x$  and  $A_{\text{std}}$  represent the optical densities of obtained N-CDs and reference, respectively.  $\eta_x$  and  $\eta_{\text{std}}$  represent the refractive indices of obtained N-CDs and reference, respectively. The absorbances of all the samples in a 1.0 cm cuvette were kept under 0.1 at the excitation wavelength to minimize re-absorption effects.

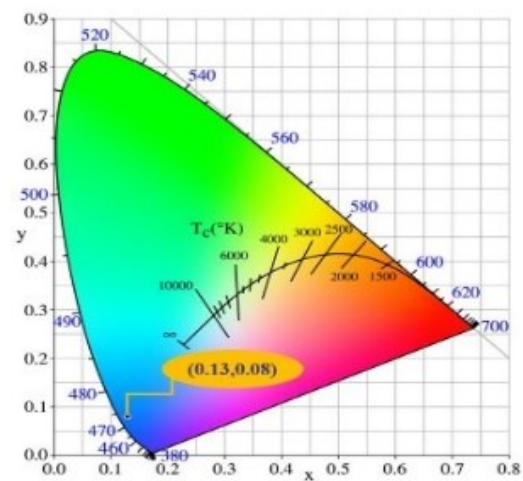

**Fig. S1** CIE chromaticity coordinate from the PL spectra of N-CDs.

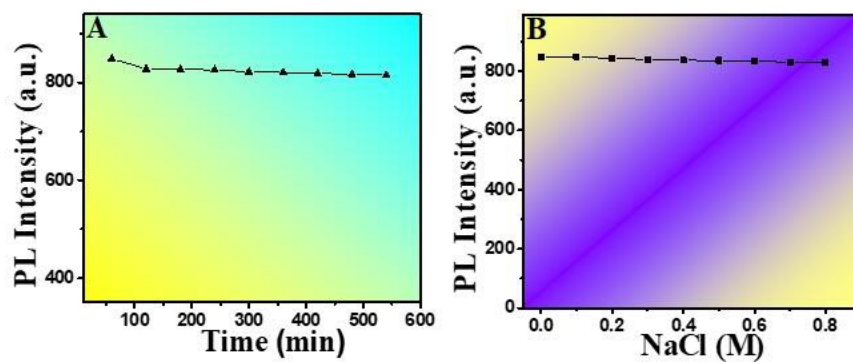

**Fig. S2** (A) Influence of storage times on the PL intensity of N-CDs. (B) Effect of ionic strength on the PL intensity of N-CDs

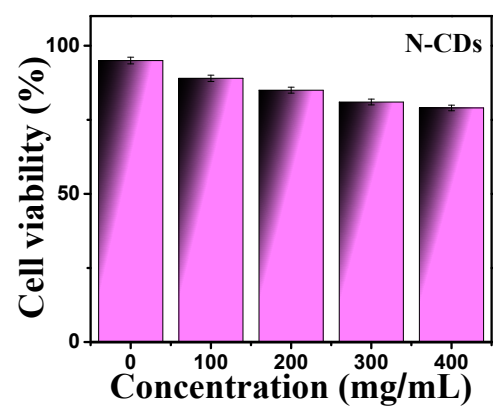

**Fig. S3** Cytotoxicity test of N-CDs.

**Table S1** Comparison of different fluorescent N-CDs based probes for Hg<sup>2+</sup> detection.

| Fluorescent probes | Raw material                        | Linear range            | Detection limit | Ref.      |
|--------------------|-------------------------------------|-------------------------|-----------------|-----------|
| CDs                | citric acid and polyethyleneimine   | 0 $\mu$ M–8 $\mu$ M     | 0.24 $\mu$ M    | [1]       |
| CDs                | Musk melon                          | 1 $\mu$ M–25 $\mu$ M    | 0.33 $\mu$ M    | [2]       |
| N, S-CDs           | glycerol and cystine                | 1 $\mu$ M–75 $\mu$ M    | 0.50 $\mu$ M    | [3]       |
| CDs                | citric acid and diethylenetriamine  | 0 $\mu$ M–30 $\mu$ M    | 0.20 $\mu$ M    | [4]       |
| CDs                | adipic acid and triammonium citrate | 4 $\mu$ M–18 $\mu$ M    | 2.47 $\mu$ M    | [5]       |
| N-CDs              | citric acid and melamine            | 2 $\mu$ M–14 $\mu$ M    | 0.44 $\mu$ M    | [6]       |
| N-CDs              | sodium citrate and urea             | 0.001 $\mu$ M–5 $\mu$ M | 0.65 $\mu$ M    | [7]       |
| CDs                | cellulose                           | 6 $\mu$ M–80 $\mu$ M    | 1.6 $\mu$ M     | [8]       |
| N-CDs              | citric acid and folic acid          | 50 $\mu$ M–400 $\mu$ M  | 0.124 $\mu$ M   | This work |

1. J. P. Wang, X. Y. Wang, X. H. Pan, W. Pan, Y. Li, X. Y. Liang, X. B. Sun, Dual-emission carbon dots achieved by luminescence center modulation within one-pot synthesis for a fluorescent ratiometric probe of pH, Hg<sup>2+</sup>, and glutathione, *Microchimica Acta*, 2020, **187**, 330.
2. M. L. Desai, S. Jha, H. Basu, R. K. Singhal, T. -J. Park, S. K. Kailasa, Acid Oxidation of Muskmelon Fruit for the Fabrication of Carbon Dots with Specific Emission Colors for Recognition of Hg<sup>2+</sup> Ions and Cell Imaging, *ACS Omega*, 2019, **4**, 19332–19340.
3. Y. Xu, H. Y. Li, B. Wang, H. C. Liu, L. Zhao, T. Y. Zhou, M. T. Liu, N. Huang, Y. Li, L. Ding, Y. H. Chen, Microwave-assisted synthesis of carbon dots for "turn-on" fluorometric determination of Hg (II) via aggregation-induced emission, *Microchimica Acta*, 2018, **185**, 252.
4. J. L. He, H. R. Zhang, J. L. Zou, Y. L. Liu, J. L. Zhuang, Y. Xiao, B. F. Lei, Carbon dots-based fluorescent probe for "off-on" sensing of Hg (II) and I-, *Biosensors and Bioelectronics*, 2016, **79**, 531–535.
5. F. Y. Yan, D. P. Kong, Y. M. Luo, Q. H. Ye, J. J. He, Carbon dots serve as an effective probe for the quantitative determination and for intracellular imaging of mercury (II), *Microchim Acta*, 2016, **183**, 1611–1618.
6. M. P. Szymt, B. Buszewski, R. G. Kopciuch, Carbon dots as rapid assays for

detection of mercury (II) ions based on turn-off mode and breast milk, *Spectrochimica Acta Part A: Molecular and Biomolecular Spectroscopy*, 2020, **236**, 118320.

7. G. J. Ren, Y. X. Meng, Q. Zhang, M. Y. Tang, B. Y. Zhu, F. Chai, C. G. Wang, Z. M. Su, Nitrogen-doped carbon dots for the detection of mercury ions in living cells and visualization of latent fingerprints, *New Journal of Chemistry*, 2018, **42**, 6824.
8. C. Y. Wang, C. F. Wang, P. P. Xu, A. Q. Li, Y. J. Chen, K. L. Zhuo, Synthesis of cellulose-derived carbon dots using acidic ionic liquid as a catalyst and its application for detection of  $\text{Hg}^{2+}$ , *Journal of Materials Science*, 2016, **51**, 861–867.
